# Supplementary material for: Peptide-Bound Methionine Sulfoxide (MetO) Levels and MsrB2 Abundance Are Differentially Regulated during the Desiccation Phase in Contrasted Acer Seeds
Source: MDPI journal article supplement (doi:10.3390/antiox9050391), 2020-05-07
Supplement: s1 [file s1]

**Table S1.** Correlation matrices calculated for embryonic axes (A) and cotyledons (B) of Norway maple (*Acer platanoides*), and embryonic axes (C) and cotyledons (D) of sycamore (*Acer pseudoplatanus*) based on levels of hydrogen peroxide (H<sub>2</sub>O<sub>2</sub>), superoxide anion radical (O<sub>2</sub><sup>•-</sup>), hydroxyl radical (•OH), ascorbic acid (AsA), dehydroascorbic acid (DHA), total pool of ascorbate (Asc), Asa to DHA ratio (AsA/DHA), levels of reduced glutathione (GSH), oxidized glutathione (GSSG), degree of oxidation of glutathione (DO), water content (WC), levels of protein-bound methionine sulfoxide (MetO), and the abundance of methionine sulfoxide reductase isoforms (MsrB1, MsrB2) against data published in Alipour et al. (2020) referring to levels of reduced (NADH) nicotinamide adenine dinucleotide (NAD), NADH to NAD<sup>+</sup> ratio (NADH/NAD<sup>+</sup> ratio), levels of reduced (NADPH) nicotinamide adenine dinucleotide phosphate (NADP), NADPH to NADP<sup>+</sup> ratio (NADPH/NADP<sup>+</sup> ratio) and reducing power based on NAD(P) concentrations. The intensity of color refers to the strength of correlation (R) coefficient (blue, positive; red negative). The intensity of red to orange color refers to the *P* value.

**A) Norway maple embryonic axes**

| <b>R</b>                            | <b>H<sub>2</sub>O<sub>2</sub></b> | <b>O<sub>2</sub><sup>•-</sup></b> | <b>•OH</b> | <b>AsA</b> | <b>DHA</b> | <b>AsA/DHA</b> | <b>GSSG</b> | <b>GSH</b> | <b>DO</b> | <b>WC</b> | <b>MsrB2</b> | <b>MetO</b> |
|-------------------------------------|-----------------------------------|-----------------------------------|------------|------------|------------|----------------|-------------|------------|-----------|-----------|--------------|-------------|
| <b>NADH</b>                         | -0,7315                           | -0,7456                           | -0,0187    | -0,5351    | -0,2701    | 0,2535         | -0,1204     | 0,5618     | -0,6083   | -0,0912   | 0,0451       | 0,2868      |
| <b>NADH/NAD<sup>+</sup> ratio</b>   | -0,2618                           | -0,4529                           | 0,2369     | 0,1836     | 0,4533     | -0,2376        | -0,1341     | 0,4306     | -0,5190   | -0,1316   | -0,1311      | 0,1824      |
| <b>NADPH</b>                        | 0,6400                            | 0,8726                            | -0,4359    | 0,5786     | 0,2713     | -0,3037        | 0,5024      | -0,7957    | 0,8727    | -0,2325   | -0,4758      | -0,6124     |
| <b>NADPH/NADP<sup>+</sup> ratio</b> | 0,5465                            | 0,8032                            | -0,5277    | 0,2225     | -0,2053    | 0,1408         | 0,5042      | -0,5887    | 0,8740    | -0,2433   | -0,2095      | -0,5828     |
| <b>reducing power</b>               | 0,7277                            | 0,8195                            | -0,1567    | 0,5742     | 0,1708     | -0,1069        | 0,2438      | -0,5272    | 0,6974    | -0,1016   | -0,1267      | -0,3879     |
| <b>NADH-dependent reductases</b>    | 0,3010                            | 0,0501                            | 0,4034     | 0,3719     | 0,7973     | -0,6471        | 0,0074      | -0,0219    | -0,0293   | 0,1727    | 0,0097       | 0,0079      |
| <b>NADPH-dependent reductases</b>   | -0,4147                           | -0,4074                           | 0,4636     | -0,5202    | -0,3280    | -0,0759        | -0,6663     | 0,0953     | -0,4465   | 0,7498    | 0,6072       | 0,6851      |

| <b>P value</b>                      | <b>H<sub>2</sub>O<sub>2</sub></b> | <b>O<sub>2</sub><sup>•-</sup></b> | <b>•OH</b> | <b>AsA</b> | <b>DHA</b> | <b>AsA/DHA</b> | <b>GSSG</b> | <b>GSH</b> | <b>DO</b> | <b>WC</b> | <b>MsrB2</b> | <b>MetO</b> |
|-------------------------------------|-----------------------------------|-----------------------------------|------------|------------|------------|----------------|-------------|------------|-----------|-----------|--------------|-------------|
| <b>NADH</b>                         | 0,0019                            | 0,0014                            | 0,9471     | 0,0398     | 0,3303     | 0,3620         | 0,6690      | 0,0293     | 0,0161    | 0,7465    | 0,8732       | 0,3001      |
| <b>NADH/NAD<sup>+</sup> ratio</b>   | 0,3459                            | 0,0900                            | 0,3953     | 0,5124     | 0,0897     | 0,3939         | 0,6338      | 0,1091     | 0,0474    | 0,6400    | 0,6414       | 0,5153      |
| <b>NADPH</b>                        | 0,0102                            | <,0001                            | 0,1044     | 0,0238     | 0,3280     | 0,2712         | 0,0563      | 0,0004     | <,0001    | 0,4044    | 0,0730       | 0,0152      |
| <b>NADPH/NADP<sup>+</sup> ratio</b> | 0,0351                            | 0,0003                            | 0,0432     | 0,4254     | 0,4629     | 0,6168         | 0,0553      | 0,0210     | <,0001    | 0,3821    | 0,4537       | 0,0226      |
| <b>reducing power</b>               | 0,0021                            | 0,0002                            | 0,5771     | 0,0252     | 0,5427     | 0,7045         | 0,3813      | 0,0434     | 0,0039    | 0,7185    | 0,6527       | 0,1531      |
| <b>NADH-dependent reductases</b>    | 0,2757                            | 0,8594                            | 0,1359     | 0,1723     | 0,0004     | 0,0091         | 0,9791      | 0,9383     | 0,9176    | 0,5381    | 0,9726       | 0,9776      |
| <b>NADPH-dependent reductases</b>   | 0,1243                            | 0,1318                            | 0,0817     | 0,0468     | 0,2327     | 0,7880         | 0,0067      | 0,7354     | 0,0952    | 0,0013    | 0,0164       | 0,0048      |

**B) Norway maple cotyledons**

| <b>R</b>                      | <b>H<sub>2</sub>O<sub>2</sub></b> | <b>O<sub>2</sub><sup>·-</sup></b> | <b>·OH</b> | <b>AsA</b> | <b>DHA</b> | <b>AsA/DHA</b> | <b>GSSG</b> | <b>GSH</b> | <b>DO</b> | <b>WC</b> | <b>MsrB2</b> | <b>MetO</b> |
|-------------------------------|-----------------------------------|-----------------------------------|------------|------------|------------|----------------|-------------|------------|-----------|-----------|--------------|-------------|
| NADH                          | -0,7728                           | -0,6246                           | 0,3010     | -0,0760    | -0,3584    | 0,8888         | 0,4801      | 0,2374     | 0,3543    | 0,5074    | 0,0268       | 0,6359      |
| NADH/NAD <sup>+</sup> ratio   | 0,9081                            | 0,7231                            | 0,0678     | -0,0869    | 0,4904     | -0,9045        | -0,5021     | 0,0045     | -0,5614   | -0,0288   | -0,2094      | -0,6775     |
| NADPH                         | -0,7004                           | -0,6752                           | 0,3656     | -0,1730    | -0,4267    | 0,7711         | 0,5774      | 0,2136     | 0,2446    | 0,5090    | 0,2735       | 0,5973      |
| NADPH/NADP <sup>+</sup> ratio | 0,6669                            | 0,7931                            | -0,5814    | 0,5937     | 0,5734     | -0,5085        | -0,5028     | -0,2277    | -0,0888   | -0,4087   | -0,5704      | -0,6159     |
| reducing power                | 0,4428                            | 0,5934                            | -0,4743    | 0,5975     | 0,5250     | -0,2659        | -0,4828     | -0,1952    | -0,0303   | -0,2628   | -0,5760      | -0,4602     |
| NADH-dependent reductases     | -0,7706                           | -0,7420                           | 0,4023     | -0,3232    | -0,3757    | 0,8374         | 0,4853      | 0,3589     | 0,2731    | 0,5060    | 0,0381       | 0,6742      |
| NADPH-dependent reductases    | -0,6759                           | -0,7555                           | 0,0447     | -0,5415    | -0,3607    | 0,3373         | 0,3905      | 0,0125     | 0,3589    | -0,3011   | 0,5873       | 0,4848      |

| <b>P value</b>                | <b>H<sub>2</sub>O<sub>2</sub></b> | <b>O<sub>2</sub><sup>·-</sup></b> | <b>·OH</b> | <b>AsA</b> | <b>DHA</b> | <b>AsA/DHA</b> | <b>GSSG</b> | <b>GSH</b> | <b>DO</b> | <b>WC</b> | <b>MsrB2</b> | <b>MetO</b> |
|-------------------------------|-----------------------------------|-----------------------------------|------------|------------|------------|----------------|-------------|------------|-----------|-----------|--------------|-------------|
| NADH                          | 0,0007                            | 0,0128                            | 0,2756     | 0,7878     | 0,1897     | <,0001         | 0,0701      | 0,3942     | 0,1951    | 0,0535    | 0,9246       | 0,0108      |
| NADH/NAD <sup>+</sup> ratio   | <,0001                            | 0,0023                            | 0,8104     | 0,7582     | 0,0635     | <,0001         | 0,0565      | 0,9872     | 0,0294    | 0,9189    | 0,4539       | 0,0055      |
| NADPH                         | 0,0036                            | 0,0057                            | 0,1802     | 0,5375     | 0,1127     | 0,0008         | 0,0242      | 0,4446     | 0,3796    | 0,0526    | 0,3240       | 0,0187      |
| NADPH/NADP <sup>+</sup> ratio | 0,0066                            | 0,0004                            | 0,0230     | 0,0196     | 0,0254     | 0,0529         | 0,0561      | 0,4145     | 0,7529    | 0,1304    | 0,0264       | 0,0145      |
| reducing power                | 0,0984                            | 0,0197                            | 0,0741     | 0,0187     | 0,0445     | 0,3382         | 0,0683      | 0,4857     | 0,9145    | 0,3439    | 0,0246       | 0,0844      |
| NADH-dependent reductases     | 0,0008                            | 0,0015                            | 0,1371     | 0,2399     | 0,1676     | <,0001         | 0,0667      | 0,1890     | 0,3247    | 0,0543    | 0,8928       | 0,0058      |
| NADPH-dependent reductases    | 0,0057                            | 0,0011                            | 0,8743     | 0,0371     | 0,1866     | 0,2189         | 0,1501      | 0,9647     | 0,1890    | 0,2754    | 0,0213       | 0,0670      |

**C) Sycamore embryonic axes**

| <b>R</b>                      | <b>H<sub>2</sub>O<sub>2</sub></b> | <b>O<sub>2</sub><sup>·-</sup></b> | <b>·OH</b> | <b>AsA</b> | <b>DHA</b> | <b>AsA/DHA</b> | <b>GSSG</b> | <b>GSH</b> | <b>DO</b> | <b>WC</b> | <b>MsrB1</b> | <b>MsrB2</b> | <b>MetO</b> |
|-------------------------------|-----------------------------------|-----------------------------------|------------|------------|------------|----------------|-------------|------------|-----------|-----------|--------------|--------------|-------------|
| NADH                          | -0,9072                           | 0,4580                            | 0,8227     | 0,4211     | -0,4147    | 0,6767         | -0,6141     | 0,7410     | -0,7755   | 0,9154    | 0,5444       | 0,7249       | 0,0194      |
| NADH/NAD <sup>+</sup> ratio   | 0,7410                            | -0,3401                           | -0,7061    | -0,5846    | 0,2806     | -0,7230        | 0,7300      | -0,7935    | 0,9212    | -0,8607   | -0,1444      | -0,6347      | 0,0899      |
| NADPH                         | -0,5793                           | 0,6877                            | 0,8336     | 0,3503     | -0,3045    | 0,5354         | -0,5374     | 0,5476     | -0,6470   | 0,7980    | 0,0595       | 0,7267       | 0,1012      |
| NADPH/NADP <sup>+</sup> ratio | 0,6374                            | -0,4813                           | -0,7289    | -0,5262    | 0,2686     | -0,6621        | 0,6654      | -0,6501    | 0,8031    | -0,8219   | 0,0022       | -0,6647      | -0,0182     |
| reducing power                | 0,7678                            | -0,4421                           | -0,7694    | -0,5745    | 0,3048     | -0,7327        | 0,7350      | -0,7663    | 0,9016    | -0,9006   | -0,1293      | -0,7063      | 0,0596      |
| NADH-dependent reductases     | 0,8327                            | -0,3615                           | -0,5360    | 0,1880     | 0,6588     | -0,3131        | 0,1321      | -0,3613    | 0,2831    | -0,5958   | -0,8680      | -0,5131      | 0,0007      |
| NADPH-dependent reductases    | -0,8659                           | 0,2134                            | 0,5229     | -0,0485    | -0,6364    | 0,4195         | -0,2541     | 0,4958     | -0,4012   | 0,6155    | 0,9213       | 0,4342       | -0,1496     |

| <b><i>P</i> value</b>               | <b>H<sub>2</sub>O<sub>2</sub></b> | <b>O<sub>2</sub><sup>·-</sup></b> | <b>·OH</b> | <b>AsA</b> | <b>DHA</b> | <b>AsA/DHA</b> | <b>GSSG</b> | <b>GSH</b> | <b>DO</b> | <b>WC</b> | <b>MsrB1</b> | <b>MsrB2</b> | <b>MetO</b> |
|-------------------------------------|-----------------------------------|-----------------------------------|------------|------------|------------|----------------|-------------|------------|-----------|-----------|--------------|--------------|-------------|
| <b>NADH</b>                         | <,0001                            | 0,1343                            | 0,0010     | 0,1728     | 0,1801     | 0,0157         | 0,0336      | 0,0058     | 0,0030    | <,0001    | 0,0673       | 0,0076       | 0,9523      |
| <b>NADH/NAD<sup>+</sup> ratio</b>   | 0,0058                            | 0,2794                            | 0,0103     | 0,0459     | 0,3771     | 0,0079         | 0,0070      | 0,0021     | <,0001    | 0,0003    | 0,6542       | 0,0266       | 0,7812      |
| <b>NADPH</b>                        | 0,0484                            | 0,0134                            | 0,0008     | 0,2643     | 0,3359     | 0,0728         | 0,0716      | 0,0654     | 0,0230    | 0,0019    | 0,8543       | 0,0074       | 0,7543      |
| <b>NADPH/NADP<sup>+</sup> ratio</b> | 0,0258                            | 0,1132                            | 0,0072     | 0,0789     | 0,3987     | 0,0190         | 0,0182      | 0,0221     | 0,0017    | 0,0010    | 0,9946       | 0,0184       | 0,9552      |
| <b>reducing power</b>               | 0,0035                            | 0,1501                            | 0,0034     | 0,0507     | 0,3353     | 0,0067         | 0,0065      | 0,0037     | <,0001    | <,0001    | 0,6888       | 0,0102       | 0,8540      |
| <b>NADH-dependent reductases</b>    | 0,0008                            | 0,2483                            | 0,0725     | 0,5584     | 0,0198     | 0,3217         | 0,6824      | 0,2485     | 0,3725    | 0,0409    | 0,0003       | 0,0880       | 0,9983      |
| <b>NADPH-dependent reductases</b>   | 0,0003                            | 0,5054                            | 0,0811     | 0,8810     | 0,0261     | 0,1746         | 0,4256      | 0,1012     | 0,1962    | 0,0331    | <,0001       | 0,1584       | 0,6426      |

#### D) Sycamore cotyledons

| <b><i>R</i></b>                     | <b>H<sub>2</sub>O<sub>2</sub></b> | <b>O<sub>2</sub><sup>·-</sup></b> | <b>·OH</b> | <b>AsA</b> | <b>DHA</b> | <b>AsA/DHA</b> | <b>GSSG</b> | <b>GSH</b> | <b>DO</b> | <b>WC</b> | <b>MsrB1</b> | <b>MsrB2</b> | <b>MetO</b> |
|-------------------------------------|-----------------------------------|-----------------------------------|------------|------------|------------|----------------|-------------|------------|-----------|-----------|--------------|--------------|-------------|
| <b>NADH</b>                         | -0,4909                           | 0,9454                            | 0,8884     | -0,1757    | 0,1824     | -0,3059        | -0,6444     | -0,2609    | -0,4141   | 0,7452    | 0,5531       | -0,4670      | -0,3782     |
| <b>NADH/NAD<sup>+</sup> ratio</b>   | 0,5953                            | -0,8121                           | -0,8914    | 0,0532     | -0,3703    | 0,4673         | 0,6080      | 0,1226     | 0,4909    | -0,8029   | -0,4088      | 0,5883       | 0,3516      |
| <b>NADPH</b>                        | -0,7683                           | 0,5625                            | 0,7616     | 0,2523     | 0,4162     | -0,3133        | -0,2361     | -0,5592    | 0,0887    | 0,7436    | -0,0999      | -0,6977      | -0,0486     |
| <b>NADPH/NADP<sup>+</sup> ratio</b> | 0,5363                            | -0,6952                           | -0,6211    | 0,1388     | 0,1521     | -0,0376        | 0,5080      | 0,2052     | 0,0672    | -0,5257   | -0,2007      | 0,3708       | 0,3257      |
| <b>reducing power</b>               | 0,5192                            | -0,7536                           | -0,6507    | 0,1572     | 0,1143     | 0,0135         | 0,5975      | 0,1077     | 0,2261    | -0,5492   | -0,3154      | 0,3613       | 0,3303      |
| <b>NADH-dependent reductases</b>    | -0,3554                           | 0,9441                            | 0,8002     | -0,2489    | -0,0140    | -0,1513        | -0,6553     | -0,2160    | -0,3941   | 0,6275    | 0,6114       | -0,3253      | -0,3940     |
| <b>NADPH-dependent reductases</b>   | 0,7096                            | -0,7324                           | -0,9492    | -0,0298    | -0,6529    | 0,8219         | 0,6449      | 0,4484     | 0,4913    | -0,9568   | -0,2770      | 0,8079       | 0,4452      |

| <b><i>P</i> value</b>               | <b>H<sub>2</sub>O<sub>2</sub></b> | <b>O<sub>2</sub><sup>·-</sup></b> | <b>·OH</b> | <b>AsA</b> | <b>DHA</b> | <b>AsA/DHA</b> | <b>GSSG</b> | <b>GSH</b> | <b>DO</b> | <b>WC</b> | <b>MsrB1</b> | <b>MsrB2</b> | <b>MetO</b> |
|-------------------------------------|-----------------------------------|-----------------------------------|------------|------------|------------|----------------|-------------|------------|-----------|-----------|--------------|--------------|-------------|
| <b>NADH</b>                         | 0,1051                            | <,0001                            | 0,0001     | 0,5850     | 0,5705     | 0,3335         | 0,0237      | 0,4128     | 0,1808    | 0,0054    | 0,0622       | 0,1259       | 0,2254      |
| <b>NADH/NAD<sup>+</sup> ratio</b>   | 0,0411                            | 0,0013                            | <,0001     | 0,8695     | 0,2361     | 0,1256         | 0,0360      | 0,7042     | 0,1051    | 0,0017    | 0,1870       | 0,0442       | 0,2624      |
| <b>NADPH</b>                        | 0,0035                            | 0,0569                            | 0,0040     | 0,4289     | 0,1784     | 0,3214         | 0,4600      | 0,0587     | 0,7841    | 0,0056    | 0,7574       | 0,0116       | 0,8808      |
| <b>NADPH/NADP<sup>+</sup> ratio</b> | 0,0722                            | 0,0121                            | 0,0311     | 0,6671     | 0,6371     | 0,9077         | 0,0917      | 0,5224     | 0,8356    | 0,0792    | 0,5317       | 0,2354       | 0,3016      |
| <b>reducing power</b>               | 0,0836                            | 0,0047                            | 0,0219     | 0,6256     | 0,7236     | 0,9667         | 0,0402      | 0,7390     | 0,4799    | 0,0644    | 0,3180       | 0,2486       | 0,2944      |
| <b>NADH-dependent reductases</b>    | 0,2568                            | <,0001                            | 0,0018     | 0,4354     | 0,9656     | 0,6388         | 0,0207      | 0,5002     | 0,2049    | 0,0289    | 0,0346       | 0,3021       | 0,2050      |
| <b>NADPH-dependent reductases</b>   | 0,0097                            | 0,0068                            | <,0001     | 0,9269     | 0,0213     | 0,0010         | 0,0235      | 0,1437     | 0,1048    | <,0001    | 0,3834       | 0,0015       | 0,1470      |
