# Supplementary material for: Peptide-Bound Methionine Sulfoxide (MetO) Levels and MsrB2 Abundance Are Differentially Regulated during the Desiccation Phase in Contrasted Acer Seeds
Source: MDPI journal article supplement (doi:10.3390/antiox9050391), 2020-05-07
Supplement: s1 [file s1]

**Figure S1. Histochemical detection of reactive oxygen species in dried *Acer* seeds.** Hydrogen peroxide ( $\text{H}_2\text{O}_2$ ) was visualized in whole Norway maple seeds and sycamore seeds as a reddish-brown stain formed by the reaction with DAB solution according to the method of Daudi and O'Brien (2012). Superoxide anion ( $\text{O}_2^{\bullet-}$ ) was visualized as a dark blue-to-black stain formed by NBT using according to the protocol of Kumar et al. (2014). Images were taken on a plain white background using a Nikon D3100 digital camera attached to a binocular microscope.

#### Norway maple seeds

|                        |  | WATER CONTENT [%]                                                                  |                                                                                    |                                                                                    |                                                                                     |                                                                                      |
|------------------------|--|------------------------------------------------------------------------------------|------------------------------------------------------------------------------------|------------------------------------------------------------------------------------|-------------------------------------------------------------------------------------|--------------------------------------------------------------------------------------|
|                        |  | 50%                                                                                | 40%                                                                                | 30%                                                                                | 20%                                                                                 | 10%                                                                                  |
| $\text{H}_2\text{O}_2$ |  |   |   |   |   |   |
|                        |  |  |  |  |  |  |

#### Sycamore seeds

|                        |  | WATER CONTENT [%]                                                                   |                                                                                     |                                                                                      |                                                                                       |
|------------------------|--|-------------------------------------------------------------------------------------|-------------------------------------------------------------------------------------|--------------------------------------------------------------------------------------|---------------------------------------------------------------------------------------|
|                        |  | 60%                                                                                 | 50%                                                                                 | 40%                                                                                  | 30%                                                                                   |
| $\text{H}_2\text{O}_2$ |  |  |  |  |  |
|                        |  |  |  |  |  |
